# Supplementary material for: Trophic interaction and livestock dependence of snow leopard and sympatric carnivores in Tianshan, Northwest China.
Source: Research Square preprint supplement (doi:10.21203/rs.3.rs-4539773/v1), 2024-06-24
Supplement: Supplementary file 1 [file 218b0a6ca56eed285ae60cf3.docx]

**Hua Zhong *et al*.**

Trophic interaction and livestock dependence of snow leopard and sympatric carnivores in Tianshan, Northwest China.

**Appendix S1**

**Laboratory analysis-Detailed methods**

DNA Extraction

Prior to the DNA extraction, A homogenization treatment was carried out. DNA was extracted using QIAamp PowerScat Pro DNA Kit (Cat. No. 51804，Qiagen). To avoid contamination, all extraction processes were performed over a workbench which was sterilized with 75% alcohol and wiped with nuclease removal reagent (R0123, Beyotime). Negative control was set for each batch to check the standardization of operation. DNA extract was examined by electrophoresis of 1.5% agarose gel. DNA concentration, A260/A280 and A260/A230 were determined using ultraviolet spectrophotometer (NP80, Implen) before DNA extract was stored at -30℃.

Predator identification

Primer pairs of 16S-F/R (Xiong *et al.,* 2016) were used (Appendix S1: [Table S1](#TableS1)) to identify the origin of scat, which amplifies a 350bp gene fragment from mitochondrial genome. Each reaction system had 20μL, containing 2 μL DNA template; 10μL 2×Premix Taq (Ex Taq Version 2.0; Takara Biopharmaceutical Co., LTD.) ; 0.2μM 16S-F/R primers; 3.2μL ddH2O (RT121-02; Tiangen Biotech) and 0.4mg/mL bovine serum albumin (A8010, Solarbio). PCR reaction was pre-denaturation at 95℃ for 5 min, denaturation at 95℃ for 30s, annealing at 55℃ for 30s, extension at 72℃ for 45s, 35 cycles, and a final extension at 72℃ for 10 min.

Table S1 Primer used in this study

| Primer name | Primer purpose | Product length | Annealing temperature | (5’–3’) | Literature |
| --- | --- | --- | --- | --- | --- |
| 16S | Predator  identification | ~350 bp | 55℃ | F: GAGAAGACCCTATGGAGC  R: ATAGAAACCGACCTGGAT | (Xiong *et al.,* 2016) |
| 12SV5 | Prey  identification | ~150 bp | 55℃ | F: TAGAACAGGCTCCTCTAG  R: TTAGATACCCCACTATGC | (Tiayyba *et al.,* 2011a) |

Prey identification

We applied the universal primer 12SV5 (Tiayyba *et al.,* 2011b) (Appendix S1: [Table S1](#TableS1)) for the prey identification, amplifying a 150bp gene segment. Primer barcodes of 6 nucleotides were added to the 5’ end of each primer. Species-specific blocking oligos (Hege & Simon 2008; Vestheim *et al.,* 2011; Shao *et al.,* 2019) (Appendix S1: [Table S2](#TableS2)) were used to inhibit the amplification of predator DNA, and thus allowing the amplification of prey DNA. Three biological replicates were set for each sample.

Each PCR system consisted of 25μL, including 5μL DNA template; 12.5μL 2×Premix Taq (Ex Taq Version 2.0) ; 0.1μM 12SV5-F/R primers; 1μM blocking oligo, 0.2mg/mL Bovine Serum Albumin and ddH2O. PCR reaction was pre-denaturation at 95℃ for 10 min, denaturation at 95℃ for 30s, annealing at 55℃ for 30s, 45 cycles, and no final extension. All PCRs were performed with a negative control (using deionized water instead of DNA templates) to check possible contamination. PCR and DNA extraction were performed in isolated areas. All experimental consumables were sterilized in a high-pressure steam cooker (120℃, 20min) and then dried in an oven (70℃, 3h). Tips with filters were used to avoid potential cross-contamination.

Table S2 Blocking oligo used in this study

| Blocking oligo | Target  species | (5’–3’) | Literature |
| --- | --- | --- | --- |
| UNCiB | Snow leopard | CTATGCTTAGCCCTAAACCTAGATAGTTAGCTCAAACAAAACTAT-C3 | (Shehzad *et al.,* 2012) |
| PrioC | Wolf | CTATGCTTAGCCCTAAACATAGATAATTTTACAACAAAATAATTCG-C3 | (Shao *et al.,* 2019) |
| PrioC | Dog | CTATGCTTAGCCCTAAACATAGATAATTTTACAACAAAATAATTCG-C3 | (Shao *et al.,* 2019) |
| PrioV | Red fox | CTATGCTTAGCCCTAAACATAAATAGTTCTATAACAAAACAATTCG-C3 | (Shao *et al.,* 2019) |

High-throughput sequencing

PCR products were first purified using *EasyPure*® PCR Purification Kit (EP101-01, TransGen), and products of same predator species were pooled together. Paired-end sequencing was performed using NovaSeq6000 (Illumina Inc., San Diego, CA, USA) by Novogene Biotechnology Co., LTD, Beijing. A total of 150 nucleotides were sequenced for each read.

Bioinformatics process

Raw sequence was filtered by Fastp, for any read: when N (unknown nucleic acid residue) exceeds 10% of the base number, remove the pair reads; when the number of low-quality (Quality score<=5) base exceeds 50% of the base number, remove the paired reads; When any read contains adapters, remove the paired reads. Filtered sequence was processed by QIIME 2 (2022.02) (Bolyen *et al.,* 2019) package. Barcode identification (assign): QIIME ‘cutadapt’ was used to identify and compare primer barcode and primer (first 6 nucleotides), and reads were assigned to the corresponding samples allowing maximum mismatch of 1 nucleotide. Reads that failed to be assigned were discarded. Assembly, Denoise and Chimeric Removal were preformed by using QIIME ‘dada2’. Primer barcode and reads end (40-45bp) of low-quality (Quality score<=20) were removed.

Prey species identification was carried out by BLAST, according to the species inventory of the study area, “A Guide to the Mammals of China” (Smith *et al.,* 2010), “A Field Guide to the Birds of China” (Mackinnon & Phillipps 2000) and IUCN Red List. Reads of carnivores, human, or hits from non-homologous gene were excluded. One MOTU will be excluded from subsequent analysis when its reads are less than 1% of the total reads of the sample, since it is considered to be from cross-contamination (Shao *et al.,* 2019). Analogically, one sample will be excluded when its reads are less than 100 since it is considered to be inaccurate to reveal dietary information.

**Dietary composition -** **MOTU Table**

Table S3 Result of prey MOTUs of four carnivores.

| Common name | Occurrence | | | | Scientific name |
| --- | --- | --- | --- | --- | --- |
| Snow leoard *N*=35 | Wolf *N*=7 | Dog *N*=17 | Red Fox *N*=20 |
| **Artiodactyla** |  |  |  |  |  |
| Ibex | 17 | 4 | 8 | 6 | *Capra sibirica* |
| Elk | 10 | 3 | 8 | 6 | *Cervus canadensis* |
| Wild Boar | 6 | 0 | 3 | 0 | *Sus scrofa* |
| Roe Deer | 3 | 0 | 0 | 0 | *Capreolus pygargus* |
| Goat | 10 | 2 | 3 | 4 | *Capra hircus* |
| Sheep | 0 | 1 | 2 | 0 | *Ovis aries* |
| Cattle | 0 | 0 | 0 | 2 | *Bos taurus* |
| **Lagomorpha** |  |  |  |  |  |
| Hare | 0 | 0 | 1 | 0 | *Lepus tolai* |
| **Rodentia** |  |  |  |  |  |
| Marmot | 7 | 1 | 0 | 0 | *Marmota baibacina* |
| Eurasian red squirrel | 0 | 0 | 0 | 3 | *Sciurus vulgaris* |
| Herb Field Mouse | 0 | 0 | 0 | 1 | *Apodemus uralensis* |
| Large-eared Vole | 0 | 0 | 0 | 2 | *Alticola macrotis* |
| Grey Dwarf Hamster | 0 | 0 | 0 | 1 | *Cricetulus migratorius* |
| Root vole | 0 | 0 | 0 | 2 | *Alexandromys oeconomus* |
| Microtus | 0 | 0 | 0 | 2 | *Microtus* |
| Circetidae | 0 | 0 | 0 | 3 | *Circetidae* |
| **Eulipotyphla** |  |  |  |  |  |
| Siberian Shrew | 0 | 0 | 0 | 1 | *Crocidura sibirica* |
| Sorex | 0 | 0 | 0 | 1 | *Sorex* |
| **Galliformes** |  |  |  |  |  |
| Himalayan Snowcock | 1 | 0 | 0 | 1 | *Tetraogallus himalayensis* |
| Chukar | 0 | 0 | 1 | 7 | *Alectoris chukar* |

**Dietary comparison**

Table S4 Chi-square Test results of dietary comparison between carnivore species

| Species | Snow leopard | Wolf | Dog | Red fox |
| --- | --- | --- | --- | --- |
| Snow leopard | / | 1.0000 | 0.4080 | 2.896e-08 |
| Wolf | / | / | 0.3602 | 0.02494 |
| Dog | / | / | / | 0.000556 |

Literature cited

Bolyen, E., Rideout, J.R., Dillon, M.R., Bokulich, N.A., Abnet, C.C., Al-Ghalith, G.A., Alexander, H., Alm, E.J., Arumugam, M., Asnicar, F. *et al.* Reproducible, interactive, scalable and extensible microbiome data science using QIIME 2[J]. Nature Biotechnology, 2019, 37(8): 852-857.

Hege, V., Simon, N.J. Blocking primers to enhance PCR amplification of rare sequences in mixed samples – a case study on prey DNA in Antarctic krill stomachs[J]. Frontiers in Zoology, 2008, 5(12): 12.

Mackinnon, J., Phillipps, K. A Field Guide to the Birds of China[J]. Colonial Waterbirds, 2000, 18(1): 841-843.

Shao, X., Song, D., Huang, Q., Li, S., Yao, M. Fast surveys and molecular diet analysis of carnivores based on fecal DNA and metabarcoding[J]. Biodiversity Science, 2019, 27(5): 543-556.

Shehzad, W., Riaz, T., Nawaz, M.A., Miquel, C., Poillot, C., Shah, S.A., Pompanon, F., Coissac, E., Taberlet, P. Carnivore diet analysis based on next-generation sequencing: application to the leopard cat (Prionailurus bengalensis) in Pakistan[J]. Molecular ecology, 2012.

Smith, E.b.A.T., Yan Xie, R.S.H., Darrin Lunde, John MacKinnon, Don E. Wilson, Gemma, W.C.W.I.b.F. A Guide to the Mammals of China[J]. Princeton University Press, 2010.

Tiayyba, R., Wasim, S., Alain, V., Franois, P., Pierre, T., Eric, C. ecoPrimers: inference of new DNA barcode markers from whole genome sequence analysis[J]. Nucleic Acids Research, 2011a(21): e145.

Vestheim, H., Deagle, B.E., Jarman, S.N. Application of blocking oligonucleotides to improve signal-to-noise ratio in a PCR[J]. Methods in Molecular Biology (Clifton, N.J.), 2011, 687: 265-274.

Xiong, M., Shao, X., Long, Y., Bu, H., Zhang, D., Wang, D., Li, S., Wang, R., Yao, M. Molecular analysis of vertebrates and plants in scats of leopard cats (Prionailurus bengalensis) in southwest China[J]. Journal of Mammalogy, 2016, 97(4): 1054-1064.

Tiayyba, R., Wasim, S., Alain, V., Franois, P., Pierre, T., Eric, C. ecoPrimers: inference of new DNA barcode markers from whole genome sequence analysis[J]. Nucleic Acids Research, 2011b, 39(21): e145.
